# Supplementary material
Source: PubMed Central journal article supplement (PMC2776468)
Supplement: 0907941106_0907941106SI.pdf [file 0907941106_0907941106SI.pdf]

# Supporting Information

Pang et al. 10.1073/pnas.0907941106

## SI Materials and Methods.

**Media, Culture Growth, and General DNA Manipulations.** Cultures were grown in standard Luria–Bertani (LB) media supplemented with ampicillin (100  $\mu\text{g}/\text{mL}$ ), chloramphenicol (10  $\mu\text{g}/\text{mL}$ ), and kanamycin (40  $\mu\text{g}/\text{mL}$ ) as indicated. IPTG and arabinose were used for inductions of plasmid-borne promoters at final concentrations of 1 mM and 0.2%, respectively. Lysis profiles were obtained by monitoring  $A_{550}$  after thermal or IPTG/arabinose inductions, as described previously (1, 2). Site-directed mutagenesis, cloning steps and DNA sequencing have been described (1).

**Bacterial Strains, Bacteriophages, and Plasmids.** The key features of the bacterial strains, bacteriophages, and plasmids used in this work are listed in Table S1.

For cysteine modification and cross-linking experiments, derivatives of the plasmid pS<sup>2168</sup> were used (Fig. S8A). The plasmid, pS<sup>2168</sup> was derived from pBP121 (3), which has the entire phage 21 lysis gene cassette, genes (*SRRzRzI*)<sup>21</sup> (4), cloned in pBR322 under its native promoter, the late gene promoter pR<sup>21</sup>. Also, the *S*<sup>2168</sup> gene is modified by deletion of its first three codons, creating the allele *S*<sup>2168</sup>, the Shine–Dalgarno sequence serving the *S*<sup>2168</sup> gene is changed from 5'-CGGAGGC-3' to 5'-CGGAGGT-3', and the other three lysis genes were inactivated by introducing amber nonsense codons into *Rz*<sup>21</sup> (positions Tyr39 and Tyr42), *Rz*<sup>21</sup> (Gln100), and *RzI*<sup>21</sup> (Trp39). All pS<sup>2168</sup> based plasmids were transformed into the strain MDS12 $\Delta$ tonA (RY 17341) (5), carrying the prophage  $\lambda$ Q<sup>21</sup> $\Delta$ (*SRRzRzI*)<sup>21</sup> (Fig. S8C), which, by thermal-induction, provides the phage 21 late gene activator, Q<sup>21</sup>, to trans activate the pS<sup>2168</sup>. The bacteriophage  $\lambda$ Q<sup>21</sup> $\Delta$ (*SRRzRzI*)<sup>21</sup> was generated by recombination between *hly21Kan* (3) and pBR-Cam<sup>R</sup> (Fig. S8B). The plasmid, pBR-Cam<sup>R</sup>, was derived from pBR121 (3) by replacing the DNA between the EcoRI site upstream of the *S*<sup>2168</sup> gene and the ClaI site within the *kan*<sup>R</sup> gene with a *cam*<sup>R</sup> cassette (6). MDS12 $\Delta$ tonA(*hly21Kan*) was transformed with pBR-Cam<sup>R</sup> and a lysate was obtained by thermal induction. The lysate was used to infect MDS12 $\Delta$ tonA at low multiplicity and the lysogen MDS12 $\Delta$ tonA( $\lambda$ Q<sup>21</sup> $\Delta$ (*SRRzRzI*)<sup>21</sup>) was recovered by selecting on LB-Cam (10  $\mu\text{g}/\text{mL}$  chloramphenicol) and screening for sensitivity to kanamycin.

The *S*<sup>2168</sup> $\Delta$ TMD1 and *irsS*<sup>2168</sup> alleles are expressed from plasmids pS<sup>2168</sup> $\Delta$ TMD1 and pirsS<sup>2168</sup>, respectively. Plasmid pS<sup>2168</sup> $\Delta$ TMD1 is a derivative of pTP2 (7), with the codons encoding transmembrane domain (TMD)1 of *S*<sup>2168</sup> deleted (Fig. 1A), and with the introduction of nonsense codons into the (*RRzRzI*)<sup>21</sup> lysis genes, as described above. The same nonsense codons were inserted into pTP7 (7), generating the plasmid pirsS<sup>2168</sup>, encoding *S*<sup>2168</sup> with the *irs* epitope inserted after the Met4 start codon (Fig. 1A). Each plasmid was transformed into the strain MG1655 *lacI*<sup>q1</sup> *tonA::Tn10* (7, 8) carrying pQ, a low copy plasmid carrying the  $\lambda$  gene *Q*, encoding the late gene activator, under an IPTG and arabinose inducible promoter (9).

For experiments requiring coexpression of the wt *S*<sup>2168</sup> with certain derivative alleles, strain MDS12 $\Delta$ tonA carrying the inducible prophage  $\lambda$ S<sup>2168</sup> (Fig. S8C) was used as the host. The lysogen MDS12 $\Delta$ tonA( $\lambda$ S<sup>2168</sup>) was obtained by infecting MDS12 $\Delta$ tonA with the lysate obtained by thermal induction of MDS12 $\Delta$ tonA( $\lambda$ Q<sup>21</sup> $\Delta$ (*SRRzRzI*)<sup>21</sup>) carrying pS<sup>2168</sup>, selecting for lysogens on LB-Kan (40  $\mu\text{g}/\text{mL}$  kanamycin), and screening for sensitivity to chloramphenicol. Induction of this prophage re-

sults in the production of the Q<sup>21</sup> late gene activator and S<sup>2168</sup> *in trans* to coresident plasmids.

The plasmid pS<sup>2168a</sup> was used to provide the other *S*<sup>2168</sup> allele *in trans* to  $\lambda$ S<sup>2168</sup>. It was constructed by inserting the DNA between the middle of the *Q*<sup>21</sup> gene and the PstI site downstream of the 21 lysis cassette of the plasmid pS<sup>2168</sup> into the NcoI and PstI sites of plasmid pRE (Fig. S8A) (7). Thus, the plasmid pS<sup>2168a</sup> has the pR<sup>21</sup> promoter and the entire lysis gene cassette, identical to pS<sup>2168</sup>, except that it carries *Amp*<sup>R</sup>, instead of *Kan*<sup>R</sup>. The plasmid pirsS<sup>2168\*</sup> was used to provide a copy of *irsS*<sup>2168</sup> allele *in trans* to  $\lambda$ S<sup>2168</sup>. It was derived from plasmid pS<sup>2168a</sup>, with the codons encoding the *irs* epitope inserted after the Met4 codon of the *S*<sup>2168</sup> gene.

Plasmids pETS<sup>2168his</sup>, pETS<sup>2168</sup> $\Delta$ TMD1<sup>his</sup>, and pETirsS<sup>2168his</sup> were used for overexpression of *S*<sup>2168his</sup>, *S*<sup>2168</sup> $\Delta$ TMD1<sup>his</sup>, and *irsS*<sup>2168his</sup>, respectively. The pETS<sup>2168his</sup> carries *S*<sup>2168</sup> inserted into the hyperproduction plasmid pET11a, with codons encoding the purification tag GGH<sub>6</sub>GG inserted between codons 66 and 67 (7). The plasmids pETS<sup>2168</sup> $\Delta$ TMD1<sup>his</sup> and pETirsS<sup>2168his</sup> are isogenic to pETS<sup>2168his</sup>, but encode the  $\Delta$ TMD1 and *irs*-tagged derivatives, respectively. Each plasmid was transformed into *Escherichia coli* strain C43(DE3) (10).

For *in vivo* characterization of *S*<sup>2168his</sup> and *irsS*<sup>2168his</sup>, plasmids pS<sup>2168his</sup> and pirsS<sup>2168his</sup> were used, respectively. The pS<sup>2168his</sup> is identical to pS<sup>2168a</sup>, except that the DNA sequence encoding the his-tag was inserted between codons 66 and 67, as in the plasmid pETS<sup>2168his</sup>. Similarly, the plasmid pirsS<sup>2168his</sup> was derived from pirsS<sup>2168\*</sup>. Each plasmid was transformed into lysogen MDS12 $\Delta$ tonA( $\lambda$ Q<sup>21</sup> $\Delta$ (*SRRzRzI*)<sup>21</sup>), for thermal induction.

**Purification of S<sup>2168his</sup>.** Induction, detergent extraction and purification of the his-tagged proteins were performed according to Savva et al. (11). Briefly, cells overexpressing protein S<sup>2168his</sup> or its variants were pelleted and resuspended in lysis buffer (20 mM Tris, pH 7.9/150 mM NaCl/1 mM DTT/1 mM EDTA/1 mM PMSF) and lysed by passing through a French pressure cell (Spectronic Instruments) at 16,000 psi. Whole cells and cell debris were removed by centrifugation at 10,000  $\times$  g in a Sorvall SS-34 rotor for 15 min at 4 °C. Membranes were harvested by ultracentrifugation at 130,000  $\times$  g for 90 min at 4 °C in a Beckman Ti50.2 rotor, and extracted overnight at 4 °C in buffer containing 20 mM Tris pH 7.9/150 mM NaCl/10 mM MgCl<sub>2</sub>/1 mM PMSF/1% (wt/vol) n-dodecyl- $\beta$ -D-maltopyranoside (DDM; Anatrace). Soluble material was separated from insoluble material by ultracentrifugation in 4 °C at 130,000  $\times$  g for 90 min, and was applied to Talon Metal Affinity Resin (Clontech) for Immobilized Metal Affinity Chromatography (IMAC). S<sup>2168his</sup> or its variants was eluted in buffer containing 20 mM Tris, pH 7.9/150 mM NaCl/500 mM imidazole/0.1% (wt/vol) DDM.

**Gel Filtration Chromatography.** Gel filtration analysis was performed on an AKTA FPLC workstation (Amersham Pharmacia). Briefly, purified protein samples in elution buffer [20 mM Tris, pH 7.9/150 mM NaCl/500 mM imidazole/0.1% (wt/vol) DDM] were centrifuged in 4 °C at 130,000  $\times$  g for 10 min to remove any aggregates. A 300- $\mu\text{L}$  volume of each supernatant was loaded on a Superdex 200 10/300 GL column [Amersham Pharmacia; bed dimensions 10  $\times$  300 mm, bed volume 24 mL, preequilibrated with buffer containing 20 mM Tris, pH 7.9/150 mM NaCl/0.1% (wt/vol) DDM] with flow rate 0.4 mL/min at

room temperature, eluted with the same preequilibration buffer, and collected in 1 mL fractions.

**SDS/PAGE and Western Blotting.** SDS/PAGE and Western blotting was performed as described (7). Briefly, 10% Tris-Tricine gels were used to separate protein samples. Proteins were then transferred to either 0.2  $\mu\text{m}$  PVDF membranes (Pall), for S<sup>21</sup>68 and irsS<sup>21</sup>68 protein variants; or 0.1  $\mu\text{m}$  nitrocellulose membranes (Whatman) for S<sup>21</sup>68 $\Delta\text{TMD1}$  protein variants. An antibody raised in rabbit against the S<sup>21</sup> C-terminal peptide KIREDRR-KAARGE was used as primary antibody to detect S<sup>21</sup> protein

variants (3), at a dilution of 1:1,000, and preincubated with *E. coli* strain MG1655 *lacI*<sup>q1</sup> *tonA::Tn10* or RY17341 cell lysates to reduce background. Horseradish peroxidase-conjugated goat-anti-rabbit secondary antibody (Pierce) was used at a dilution of 1:4,000. Except Fig. S7, blots were developed by using the Supersignal West Femto maximum sensitivity substrate kit (Thermo Scientific) according to the manufacturer's instructions. Images were obtained by using the Molecular Imager Gel Doc XR system (Bio-Rad) and analyzed by software Quantity One (Bio-Rad). The blot in Fig. S7 was developed by the chromogenic substrate 4-chloro-1-naphthol (Sigma).

1. Smith DL, Young R (1998) Oligohistidine tag mutagenesis of the lambda holin gene. *J Bacteriol* 180:4199–4211.
2. Tran TAT, Struck DK, Young R (2005) Periplasmic domains define holin-antiholin interactions in T4 lysis inhibition. *J Bacteriol* 187:6631–6640.
3. Barenboim M, Chang CY, dib Hajj F, Young R (1999) Characterization of the dual start motif of a class II holin gene. *Mol Microbiol* 32:715–727.
4. Bonovich MT, Young R (1991) Dual start motif in two lambdoid S genes unrelated to lambda S. *J Bacteriol* 173:2897–2905.
5. Kolisnychenko V, et al. (2002) Engineering a reduced *Escherichia coli* genome. *Genome Res* 12:640–647.
6. Lutz R, Bujard H (1997) Independent and tight regulation of transcriptional units in *Escherichia coli* via the LacR/O, the TetR/O and AraC/I1–I2 regulatory elements. *Nucleic Acids Res* 25:1203–1210.
7. Park T, Struck DK, Deaton JF, Young R (2006) Topological dynamics of holins in programmed bacterial lysis. *Proc Natl Acad Sci USA* 103:19713–19718.
8. Guyer MS, Reed RR, Steitz JA, Low KB (1981) Identification of a sex-factor-affinity site in *E. coli* as gamma delta. *Cold Spring Harb Symp Quant Biol* 45 Pt 1:135–140.
9. Gründling A, Manson MD, Young R (2001) Holins kill without warning. *Proc Natl Acad Sci USA* 98:9348–9352.
10. Miroux B, Walker JE (1996) Over-production of proteins in *Escherichia coli*: Mutant hosts that allow synthesis of some membrane proteins and globular proteins at high levels. *J Mol Biol* 260:289–298.
11. Savva CG, et al. (2008) The holin of bacteriophage lambda forms rings with large diameter. *Mol Microbiol* 69:784–793.
12. Gründling A, Manson MD, Young R (2001) Holins kill without warning. *Proc Natl Acad Sci USA* 98:9348–9352.

$$y = 11.156 - 0.46797x \quad R = 0.99903$$

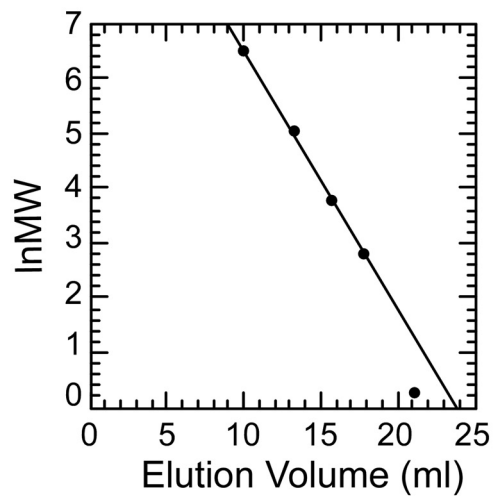

|                                  | Elution Vol (ml) | MW (kDa) | lnMW |
|----------------------------------|------------------|----------|------|
| Thyroglobulin                    | 9.829            | 670      | 6.51 |
| Bovine $\gamma$ -globulin        | 13.241           | 158      | 5.06 |
| Chicken ovalbumin                | 15.669           | 44       | 3.78 |
| Equine myoglobin                 | 17.75            | 17       | 2.83 |
| Vitamin B <sub>12</sub>          | 20.988           | 1.35     | 0.30 |
| S <sup>2168</sup> <sub>his</sub> | 13.907           | 104      | 4.65 |

**Fig. S1.** Calculation of the size of the S<sup>2168</sup> in gel-filtration chromatography. The natural logarithm of the molecular mass of each protein standard was plotted against elution volume on a Superdex 200 gel-filtration column. The elution volume of vitamin B<sub>12</sub> was close to the bed volume, and ignored in the plot. The apparent molecular mass of S<sup>2168</sup> was calculated by fitting the equation generated from the protein standard.

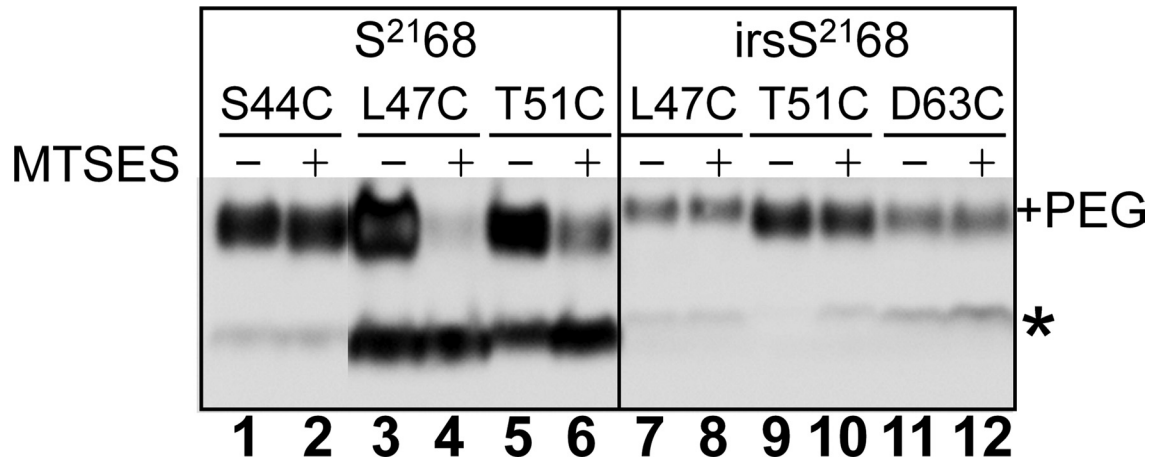

**Fig. S2.** Membrane depolarization by 2,4-dinitrophenol (DNP) treatment does not affect the methanethiosulfonate (MTSES) protection. Experiment was as described in Fig. 3, except that 1 mM DNP was added into each culture just before harvesting and into the phosphate buffer used in each step until the L-cysteine quenching reaction. (Left) S<sup>2168</sup> carrying the lysis-defective mutation S44C (lanes 1 and 2), and cysteine substitutions at the lumen-facing residues L47 (lanes 3 and 4) and T51 (lanes 5 and 6); (Right) irsS<sup>2168</sup> carrying the cysteine substitutions at L47 (lanes 7 and 8), T51 (lanes 9 and 10), and also at D63, which is located in the cytoplasmic tail (lanes 11 and 12).

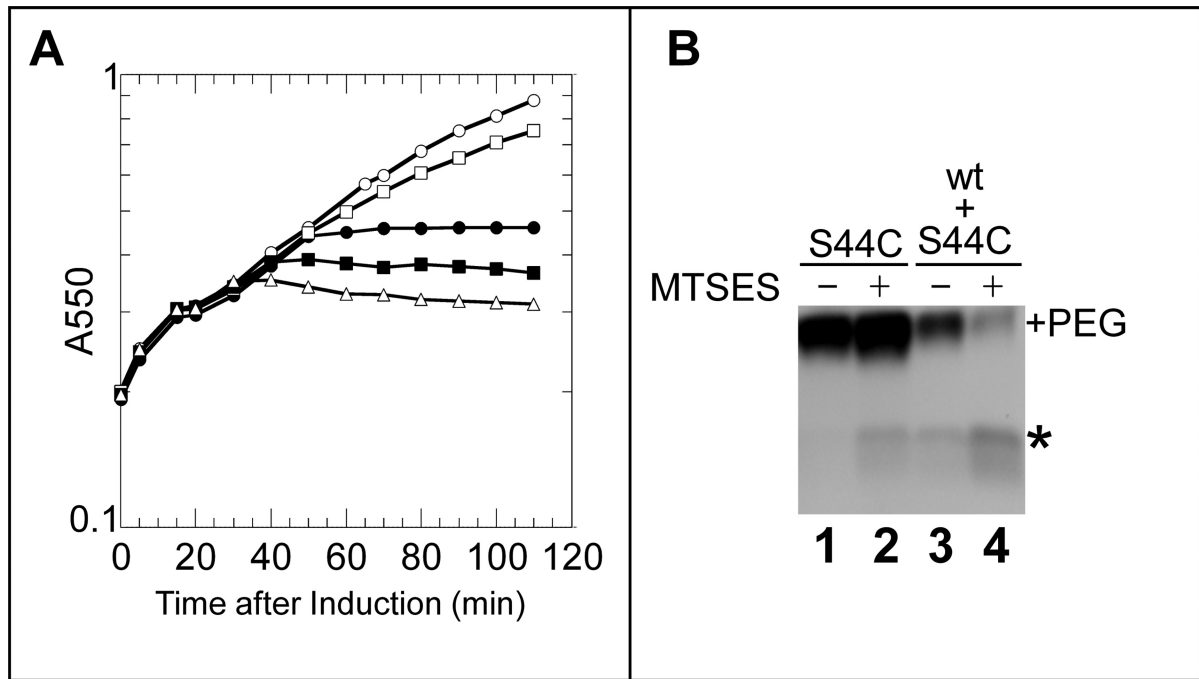

**Fig. S3.**  $S^{2168}_{S44C}$  is lysis-defective but can participate in pinhole formation with the WT protein. (A) Triggering of  $S^{2168}$  alleles. Cultures carrying indicated plasmids and prophages were induced at  $t = 0$  and monitored for culture growth as  $A_{550}$ . Open circles: prophage  $\lambda Q^{21}\Delta(SRRzRz1)^{21}$ , no plasmid. Closed circles: prophage  $\lambda S^{2168}$ , no plasmid. Open squares: prophage  $\lambda Q^{21}\Delta(SRRzRz1)^{21}$ , plasmid  $pS^{2168}_{a544C}$ . Closed squares: prophage  $\lambda S^{2168}$ , plasmid  $pS^{2168}_a$ . Open triangles: prophage  $\lambda S^{2168}$ , plasmid  $pS^{2168}_{a544C}$ . (B) MTSES-protection of position 44. Experiment as described in Fig. 3, except that the cells carried  $pS^{2168}_{a544C}$  with either (lanes 1 and 2) prophage  $\lambda Q^{21}\Delta(SRRzRz1)^{21}$  or (lanes 3 and 4) prophage  $\lambda S^{2168}$ .

$$y = -0.27938 + 0.16259x \quad R = 0.99945$$

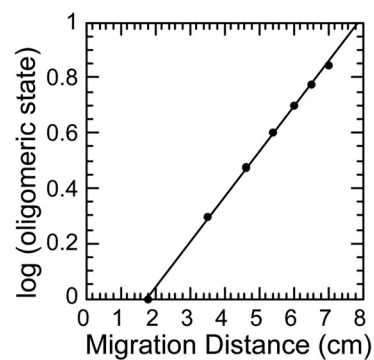

| Migration distance (cm) | Oligomeric state | Calc. Oligomeric state |
|-------------------------|------------------|------------------------|
| 1.8                     | 1                | 1.03                   |
| 3.5                     | 2                | 1.95                   |
| 4.6                     | 3                | 2.94                   |
| 5.4                     | 4                | 3.97                   |
| 6                       | 5                | 4.97                   |
| 6.5                     | 6                | 5.99                   |
| 7                       | 7                | 7.22                   |

**Fig. S4.** The DSP cross-linked  $S^{2168}$  bands correspond to their oligomeric states. The decadic logarithm of the apparent oligomeric state of each cross-linked  $S^{2168}$  band was plotted against the migration distance of each band on the gel. A linear equation was applied. In the table, the calculated oligomeric state was obtained by putting each migration distance into the equation.

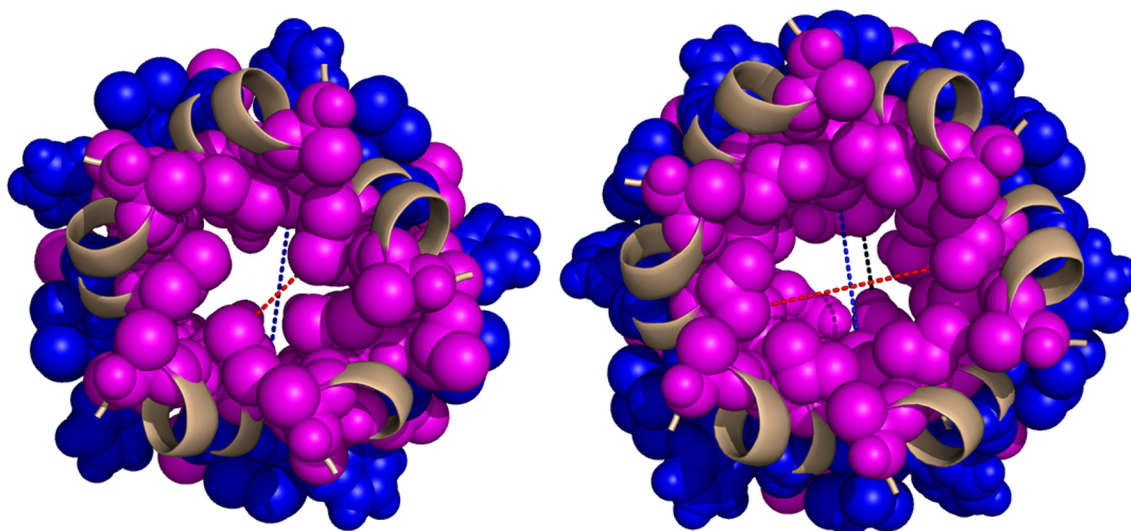

**Fig. S5.** Computational models for the pentameric (*Left*) and hexameric (*Right*) pinholes. MTSES sensitive and insensitive positions are shown in magenta and blue, respectively. Colored dashed lines show pore distances at various depths. In the pentamer: red, 6.4 Å at Val41; blue, 11.6 Å at Leu45. In the hexamer: red, 12.6 Å at Val41; blue, 10.5 Å at Leu45; black, 6.7 Å at Tyr52.



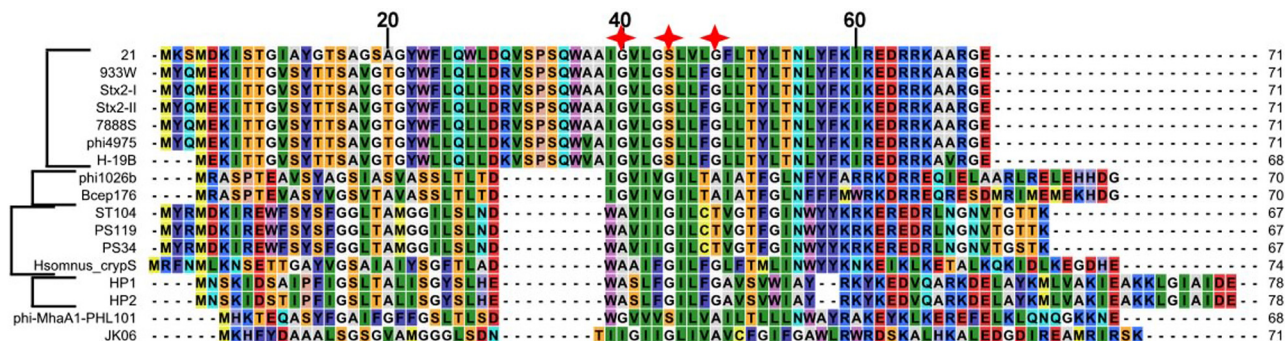

**Fig. S6.** Conservation of “glycine-zipper” motif in class II pinholins. The genomes of phages and prophages of Gram-negative bacteria were scanned for annotated holin genes. Among the class II holins (two predicted TMDs), those with putative signal-anchor release (SAR) domains were selected by the presence of a dual start motif, MxxM, or by homology to sequences with dual start motifs. The brackets indicate families of related sequences. The red stars indicate the positions of the glycine-zipper motif in  $S^{21}$ . Numbering at the top refers to  $S^{21}$ , and the length in amino acids, of each sequence is to the right. The GenBank identification numbers of these sequences are: 21: 215467; 933W: 9632510; Stx2-1: 20065950; Stx2-II: 32171159; 7888S: 10799915; phi4975: 30910957; H-19B: 2668771; phi1026b: 38707913; Bcep176: 77864684; ST104: 46358688; PS119: 30910957; PS34: 3676080; Hsomnus.cryp5: 915370; HP1: 9628629; HP2: 17981839; phi-MhaA1-PHL101: 90110550; JK06: unannotated holin gene found in phage JK06 genome, GI: 71149512.







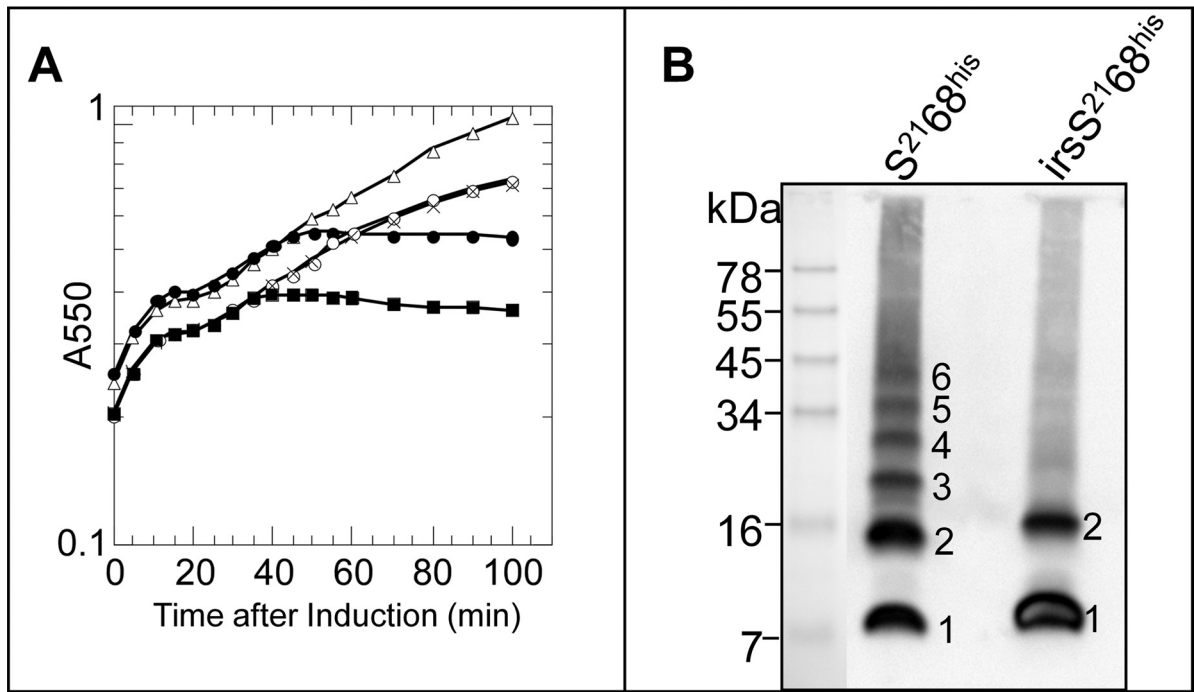

**Fig. S9.** The addition of his-tag does not affect the function of S<sup>2168</sup>. (A) Triggering of S<sup>2168</sup><sup>his</sup> alleles. Cultures carrying prophage  $\lambda Q^{21}\Delta(SRRzRz1)^{21}$  and indicated plasmids were induced at t = 0 and monitored for culture growth as A<sub>550</sub>. Open triangles: no plasmid. Closed circles: plasmid pS<sup>2168</sup>. Open circles: plasmid pirs<sup>S<sup>2168</sup>\*</sup>. Closed squares: plasmid pS<sup>2168</sup><sup>his</sup>; crosses: pirs<sup>S<sup>2168</sup><sup>his</sup></sup>. (B) DSP cross-linking of S<sup>2168</sup><sup>his</sup> and S<sup>2168</sup><sup>his</sup> in vivo. Experiment was as described in Fig. 4 Left, except that whole cells carrying prophage  $\lambda Q^{21}\Delta(SRRzRz1)^{21}$  with either plasmid pS<sup>2168</sup><sup>his</sup> or pirs<sup>S<sup>2168</sup><sup>his</sup></sup> were used.

Table S1. Bacterial strains, bacteriophages, and plasmids

|                                                                 | Genotype and relevant features                                                                                                                                                                                      | Source/reference |
|-----------------------------------------------------------------|---------------------------------------------------------------------------------------------------------------------------------------------------------------------------------------------------------------------|------------------|
| Phages                                                          |                                                                                                                                                                                                                     |                  |
| λhy21Kan                                                        | λ cI857 hy(QSRRzRz1) <sup>21</sup> bor::kan                                                                                                                                                                         | 3                |
| λQ <sup>21</sup> Δ(SRRzRz1) <sup>21</sup>                       | λ cI857 hy(Q <sup>21</sup> Δ(SRRzRz1) <sup>21</sup> ::Cam <sup>R</sup> ) bor::kan'                                                                                                                                  | This study       |
| λS <sup>21</sup> 68                                             | λhy21 Kan S <sup>21</sup> 68(R <sub>am</sub> /R <sub>z<sub>am</sub></sub> /R <sub>z1<sub>am</sub></sub> ) <sup>21</sup>                                                                                             | This study       |
| <i>E. coli</i> strains                                          |                                                                                                                                                                                                                     |                  |
| MG1655                                                          | F <sup>-</sup> <i>ilvG rfb50 rph1</i>                                                                                                                                                                               | 8                |
| MG1655 <i>lacI<sup>q1</sup>tonA::Tn10</i>                       | —                                                                                                                                                                                                                   | 7                |
| MDS12                                                           | MG1655 with 12 deletions, totalling 376,180 nt, including cryptic prophages                                                                                                                                         | 5                |
| RY 17341                                                        | MDS12Δ <i>tonA</i>                                                                                                                                                                                                  | Lab stock        |
| C43(DE3)                                                        | Derivative of BL21(DE3) [ <i>E.coli</i> F <sup>-</sup> <i>ompT hsdS<sub>B</sub></i> (r <sub>B</sub> <sup>-</sup> m <sub>B</sub> <sup>-</sup> ) <i>gal dcm</i> λ(DE3)], used for overexpression of membrane proteins | 10               |
| MDS12Δ <i>tonA</i> (λhy21Kan)                                   | Lysogen carrying prophage λhy21Kan                                                                                                                                                                                  | This study       |
| MDS12Δ <i>tonA</i> (λQ <sup>21</sup> Δ(SRRzRz1) <sup>21</sup> ) | Lysogen carrying prophage λQ <sup>21</sup> Δ(SRRzRz1) <sup>21</sup>                                                                                                                                                 | This study       |
| MDS12Δ <i>tonA</i> (λS <sup>21</sup> 68)                        | Lysogen carrying prophage λS <sup>21</sup> 68                                                                                                                                                                       | This study       |
| Plasmids                                                        |                                                                                                                                                                                                                     |                  |
| pBR121                                                          | pBR322::(Q'SRRzRz1) <sup>21</sup>                                                                                                                                                                                   | 3                |
| pBR-Cam <sup>R</sup>                                            | pBR121 with the DNA between the <i>EcoRI</i> site upstream of the S <sup>21</sup> gene and the <i>Clal</i> site within the <i>kan<sup>R</sup></i> gene replaced with a <i>cam<sup>R</sup></i> cassette              | This study       |
| pBP68                                                           | pBR121 but S <sup>21</sup> 68 instead of S <sup>21</sup>                                                                                                                                                            | 3                |
| pS <sup>21</sup> 68                                             | pBP68 (R <sub>am</sub> /R <sub>z<sub>am</sub></sub> /R <sub>z1<sub>am</sub></sub> ) <sup>21</sup> , Shine-Dalgarno sequence of S <sup>21</sup> 68 changed.                                                          | This study       |
| pTP2                                                            | pBR322 origin, pR' promoter, (S68I/RzI/Rz1) <sup>21</sup>                                                                                                                                                           | 7                |
| pS <sup>21</sup> 68 <sub>ΔTMD1</sub>                            | pTP2 with the codons encoding TMD1 of S <sup>21</sup> 68 deleted, (R <sub>am</sub> /R <sub>z<sub>am</sub></sub> /R <sub>z1<sub>am</sub></sub> ) <sup>21</sup>                                                       | This study       |
| pTP7                                                            | pTP2 encoding RYIRS fusion to N terminus of S <sup>21</sup> 68                                                                                                                                                      | 7                |
| pirsS <sup>21</sup> 68                                          | pTP7 (R <sub>am</sub> /R <sub>z<sub>am</sub></sub> /R <sub>z1<sub>am</sub></sub> ) <sup>21</sup>                                                                                                                    | This study       |
| pQ                                                              | pSC101 origin with modification, P <sub>lacIara-1</sub> promoter, Q from λ                                                                                                                                          | 12               |
| pRE                                                             | pJF118EH with <i>lacI<sup>Q</sup></i> and P <sub>tac</sub> replaced by pR' promoter                                                                                                                                 | 7                |
| pS <sup>21</sup> 68 <sub>a</sub>                                | pRE with pR' <sup>21</sup> , (S68R <sub>am</sub> /R <sub>z<sub>am</sub></sub> /R <sub>z1<sub>am</sub></sub> ) <sup>21</sup> Amp <sup>R</sup> , instead of Kan <sup>R</sup>                                          | This study       |
| pirsS <sup>21</sup> 68*                                         | pS <sup>21</sup> 68 <sub>a</sub> with codons encoding RYIRS fused to N terminus of S <sup>21</sup> 68                                                                                                               | This study       |
| pETS <sup>21</sup> 68 <sup>his</sup>                            | pET11a carrying S <sup>21</sup> 68 gene, with introduction of codons of GGH <sub>6</sub> GG between codons 66 and 67                                                                                                | 7                |
| pETS <sup>21</sup> 68 <sub>ΔTMD1</sub> <sup>his</sup>           | pETS <sup>21</sup> 68 <sup>his</sup> but S <sup>21</sup> 68 <sub>ΔTMD1</sub> instead of the S <sup>21</sup> 68                                                                                                      | This study       |
| pETirsS <sup>21</sup> 68 <sup>his</sup>                         | pETS <sup>21</sup> 68 <sup>his</sup> with codons encoding RYIRS fused to N terminus of S <sup>21</sup> 68                                                                                                           | This study       |
| pS <sup>21</sup> 68 <sup>his</sup>                              | pS <sup>21</sup> 68 <sub>a</sub> with codons encoding GGH <sub>6</sub> GG inserted between codons 66 and 67                                                                                                         | This study       |
| pirsS <sup>21</sup> 68 <sup>his</sup>                           | pS <sup>21</sup> 68 <sup>his</sup> with codons encoding RYIRS fused to N terminus of S <sup>21</sup> 68                                                                                                             | This study       |
